# Supplementary material
Source: PubMed Central journal article supplement (PMC3880793)
Supplement: NIHMS532368-supplement-table_1.pdf [file NIHMS532368-supplement-table_1.pdf]

## TABLE

**Table S1.** Compressive modulus of 6 and 10 wt % ELP hydrogels

| wt % | Genipin (+/-) | Fibronectin (+/-) | E, 20% strain (kPa) | E, 30% strain (kPa) | E, 40% strain (kPa) |
|------|---------------|-------------------|---------------------|---------------------|---------------------|
| 6    | -             | -                 | 9.2 ± 7.7           | 19.4 ± 0.4          | 48.7 ± 12.8         |
| 6    | +             | -                 | 42.3                | 56.5                | 166.3               |
| 6    | +             | +                 | 42.9 ± 5.0          | 53.4 ± 5.6          | 163.2 ± 12.7        |
| 10   | -             | -                 | 44.6 ± 6.8          | 60.5 ± 9.2          | 98.3 ± 12.5         |
| 10   | +             | -                 | 105.6 ± 7.1         | 143.3 ± 17.8        | 275.6 ± 10.5        |
| 10   | +             | +                 | 108.8 ± 7.6         | 150.2 ± 21.1        | 278.6 ± 3.5         |
